# Supplementary material for: Engineering of ferrimagnetic Cu12-cluster arrays through supramolecular interactionsElectronic supplementary information (ESI) available: χT vs. T plot for K+ salt 1b at magnetic fields of 1 and 10 kOe. See http://www.rsc.org/suppdata/cc/b2/b201585b/
Source: Royal Society of Chemistry journal article supplement (doi:10.1039/b201585b), 2002-04-18
Supplement: b201585b.doc [file b201585b.doc]

**Supplementary Material (ESI) for Chemical Communications**

**This journal is © The Royal Society of Chemistry 2002**

**Cu12K**
